# Supplementary material for: Measurement of the Anisotropic Dynamic Elastic Constants of Additive Manufactured and Wrought Ti6Al4V Alloys
Source: MDPI journal article supplement (doi:10.3390/ma15020638), 2022-01-15
Supplement: s1 [file s1]

Supplementary

# Measurement of the Anisotropic Dynamic Elastic Constants of Additive Manufactured and Wrought Ti6Al4V Alloys

**Table S1.** Phase contents in the wrought and in the EBM'ed Ti6Al4V samples, as determined using electron backscatter diffraction (EBSD).

| Material, Facet.  | Phase          | Phase Fraction (%) |
|-------------------|----------------|--------------------|
| Wrought, facet 1  | $\alpha$ (hcp) | 94.27              |
|                   | $\beta$ (bcc)  | 5.73               |
| Wrought, facet S1 | $\alpha$ (hcp) | 94.22              |
|                   | $\beta$ (bcc)  | 5.78               |
| EBM, facet 1      | $\alpha$ (hcp) | 98.91              |
|                   | $\beta$ (bcc)  | 1.08               |
| EBM, facet S1     | $\alpha$ (hcp) | 98.26              |
|                   | $\beta$ (bcc)  | 1.74               |

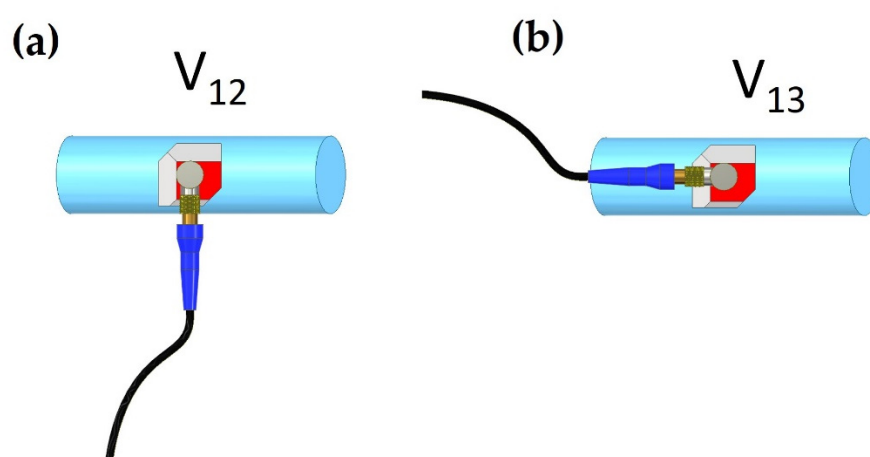

**Figure S1.** Illustration of the polygon sample of the wrought alloy at directions A (a) and F (b). The corresponding sound wave velocity notations are  $V_{12}$  and  $V_{13}$ , respectively.

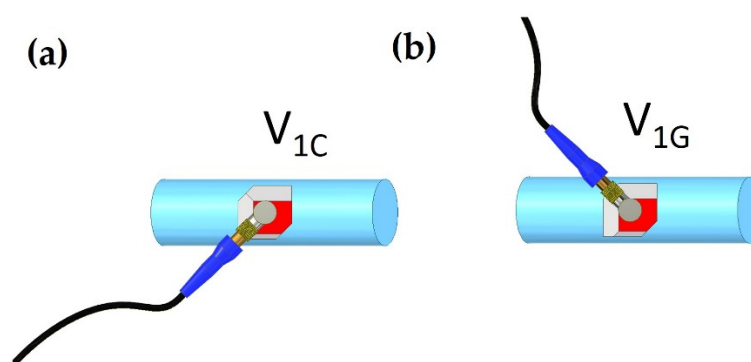

**Figure S2.** Illustration of the polygon sample of the wrought alloy at directions C (a) and G (b). The corresponding sound wave velocity notations are  $V_{1C}$  and  $V_{1G}$ , respectively.
